# Supplementary material for: Transcriptional activation of the miR-17-92 cluster is involved in the growth-promoting effects of MYB in human Ph-positive leukemia cells
Source: PubMed Central journal article supplement — Haematologica. 2018 Aug 3;104(1):82–92. doi: 10.3324/haematol.2018.191213 (PMC6312025; doi:10.3324/haematol.2018.191213), 2019-01
Supplement: 2018_191213-Disclosures_and_Contributions.pdf [file 2018_191213-Disclosures_and_Contributions.pdf]

Haematologica  
HAEMATOL/2018/191213  
Version 3

Transcriptional activation of the miR-17-92 cluster is involved in the growth-promoting effects of MYB in human Ph-positive leukemia cells

Manuela Spagnuolo, Giulia Regazzo, Marco De Dominicis, Andrea Sacconi, Andrea Pelosi, Etleva Korita, Francesco Marchesi, Francesco Pisani, Alessandra Magenta, Valentina Lulli, Iole Cordone, Andrea Mengarelli, Sabrina Strano, Giovanni Blandino, Maria G. Rizzo, and Bruno Calabretta

Disclosures: NONE

Contributions: Authors' contributions MS,GR and MDD performed experiments, with contribution of AP,EK, AM and VL; AS performed and analyzed results of statistical analyses; FM, FP, IC collected and management of patient's samples. GB, SS and AM contributed to the interpretation of the results.MGR and BC designed the study, critically interpreted results and wrote the manuscript.
